# Supplementary material for: Transport of Riverine Microplastics in the Arctic Ocean
Source: Preprints.org preprint supplement (doi:10.20944/preprints202312.0177.v1), 2023-12-04
Supplement: Supplementary file 1 [file supplementary]

Supplementary materials for ‘Transport and accumulation of riverine microplastic from  
Siberian rivers’

Table 1. List of experiments on sensitivity to plastic density, particle size and biofouling rate.

| Experiment name | Plastic density<br>(kg/m <sup>3</sup> ) | Particle size (mm) | Biofouling rate<br>(mm/day) |
|-----------------|-----------------------------------------|--------------------|-----------------------------|
| HDPE10          | 955                                     | 5                  | 0                           |
| HDPE11          | 955                                     | 5                  | 10 <sup>-4</sup>            |
| HDPE12          | 955                                     | 5                  | 10 <sup>-3</sup>            |
| HDPE13          | 955                                     | 5                  | 10 <sup>-2</sup>            |
| HDPE21          | 955                                     | 0.5                | 10 <sup>-4</sup>            |
| HDPE22          | 955                                     | 0.5                | 10 <sup>-3</sup>            |
| HDPE23          | 955                                     | 0.5                | 10 <sup>-2</sup>            |
| PP10            | 1010                                    | 5                  | 0                           |
| PP11            | 1010                                    | 5                  | 10 <sup>-4</sup>            |
| PP12            | 1010                                    | 5                  | 10 <sup>-3</sup>            |
| PP13            | 1010                                    | 5                  | 10 <sup>-2</sup>            |
| PP21            | 1010                                    | 0.5                | 10 <sup>-4</sup>            |
| PP22            | 1010                                    | 0.5                | 10 <sup>-3</sup>            |
| PP23            | 1010                                    | 0.5                | 10 <sup>-2</sup>            |
| PS10            | 1040                                    | 5                  | 0                           |

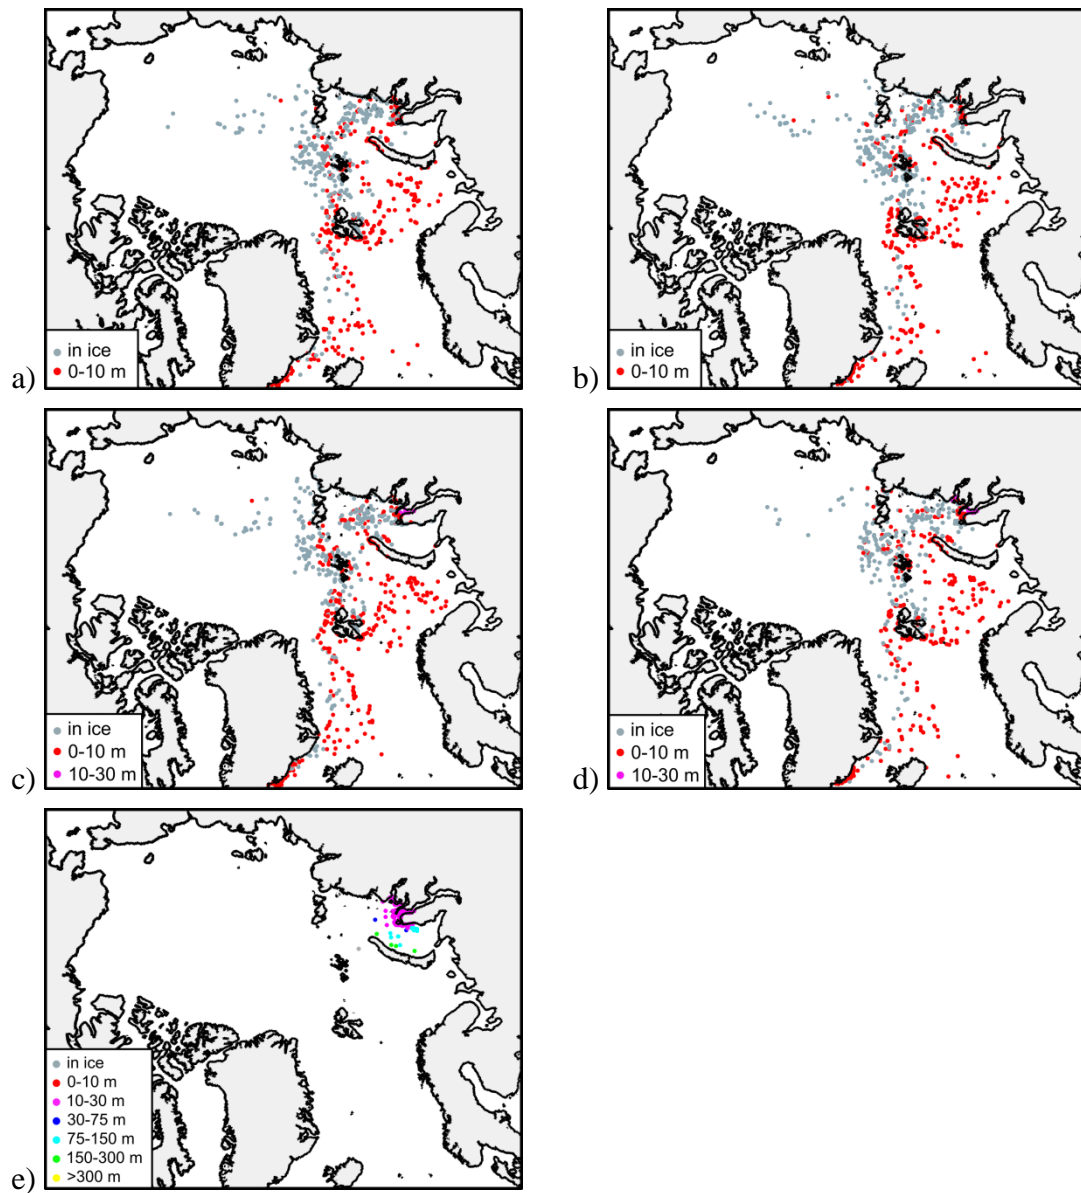

Figure 1. Simulated microplastic particles distribution after 5 years continued riverine influx without biofouling. a) HDPE10, b) HDPE20, c) PP10, d) PP20, e) PS10.

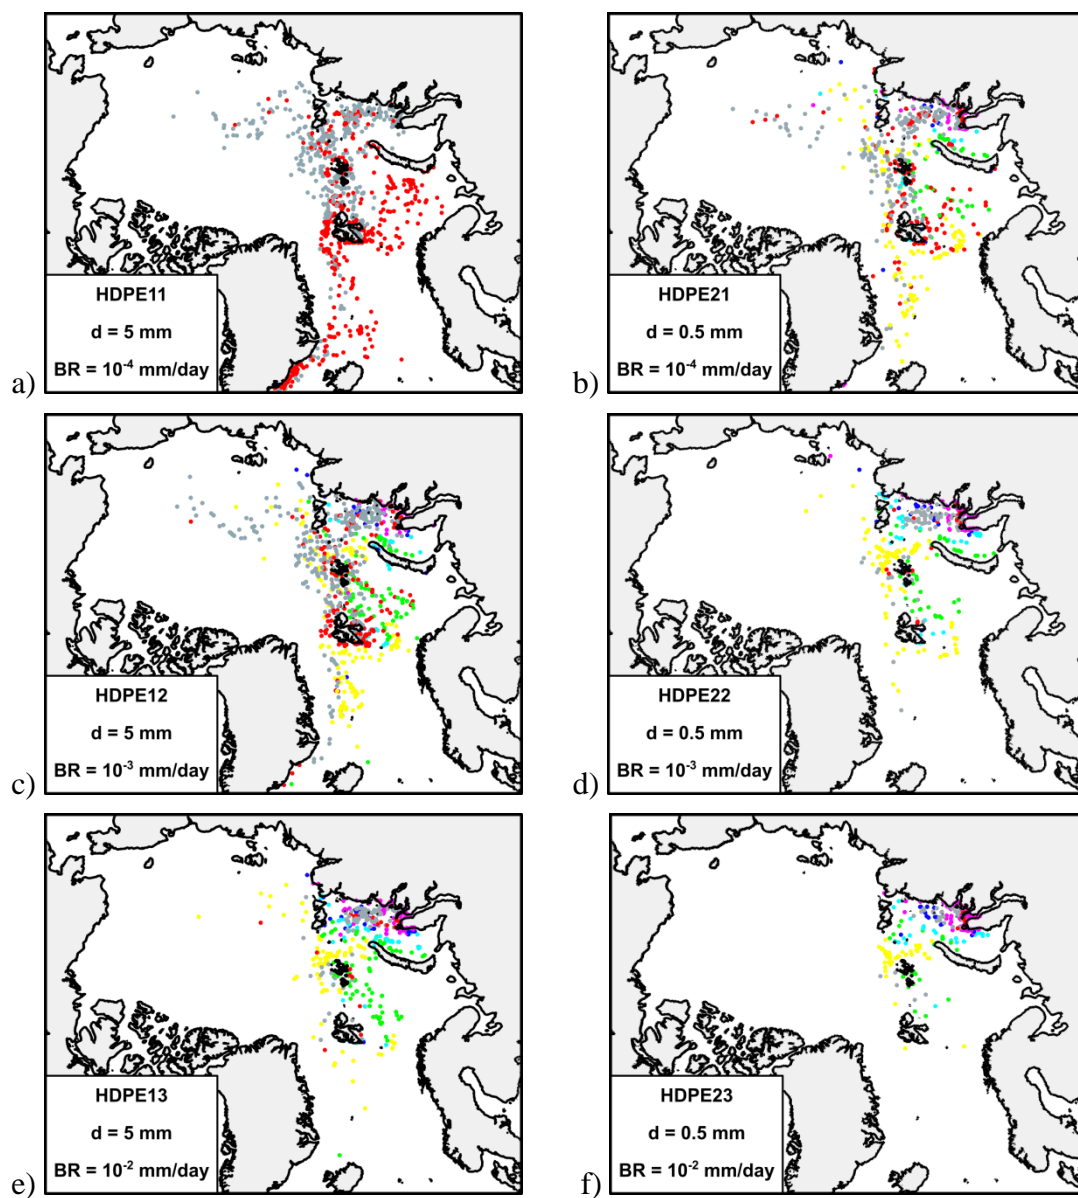

Figure 2. Simulated microplastic particles distribution after 5 years continued riverine influx for HDPE with different particle sizes and biofouling rates.

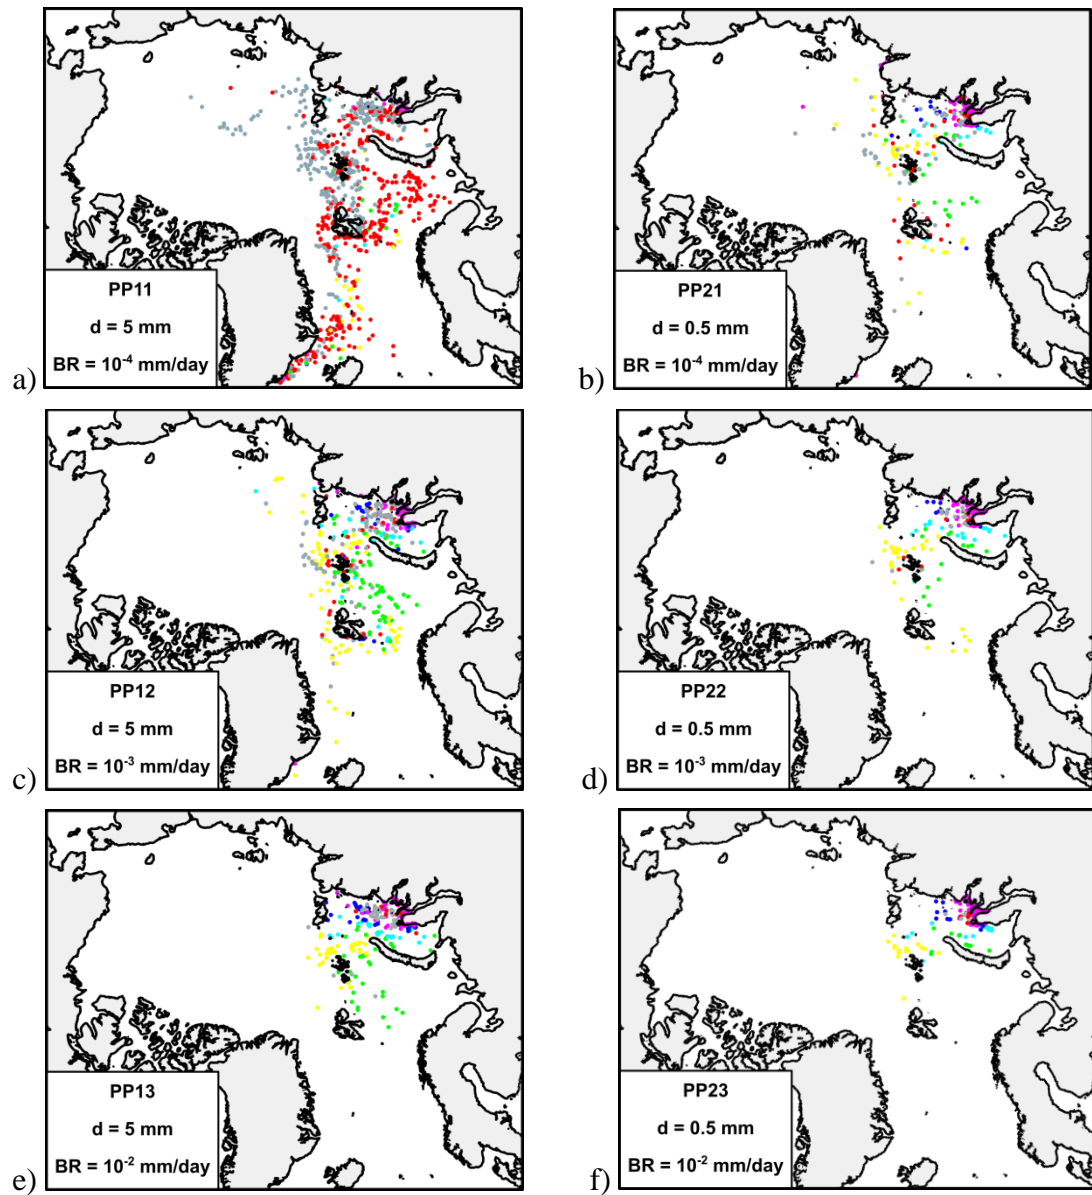

Figure 3. Simulated microplastic particles distribution after 5 years continued riverine influx for PP with different particle sizes and biofouling rates.

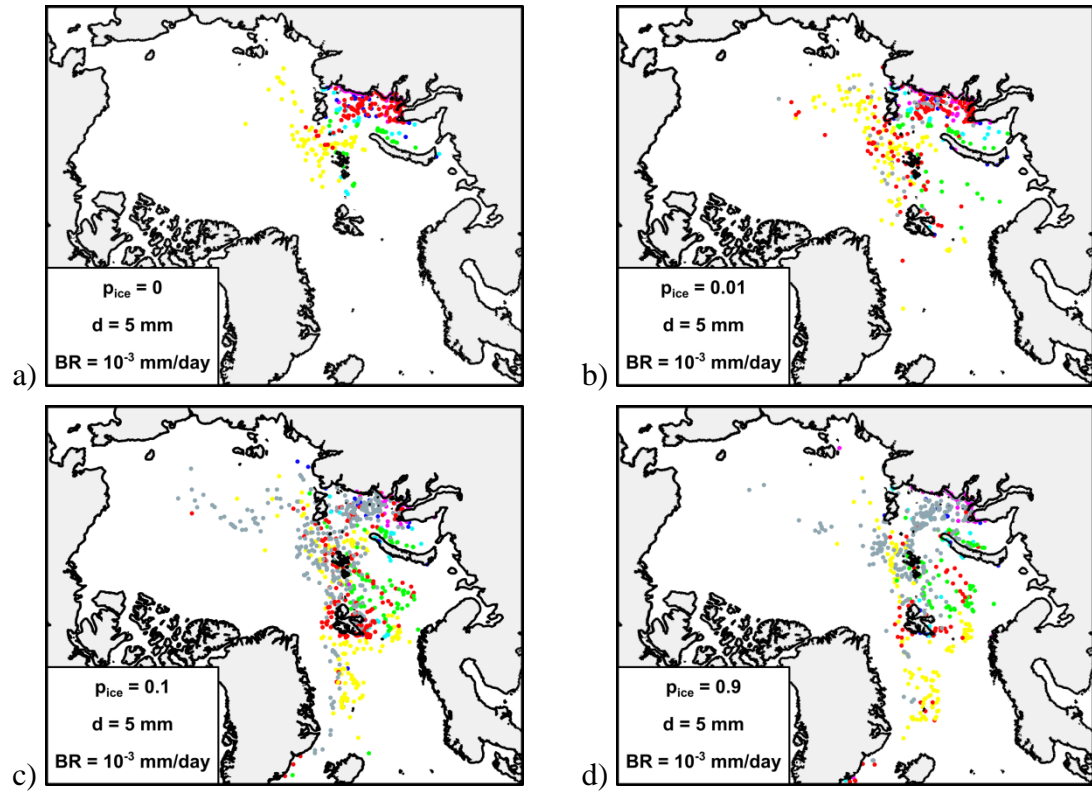

Figure 4. Simulated microplastic particles distribution after 5 years continued riverine influx for HDPE of the same particle size and biofouling rate with different probability of freezing into ice.
